# Supplementary material for: On the magneto-structural role of the coordinating anion in oxamato-bridged copper(ii) derivatives
Source: Royal Society of Chemistry journal article supplement (doi:10.1039/c9dt01277j), 2019-01-01
Supplement: c9dt01277j1.pdf [file c9dt01277j1.pdf]

## On the magneto-structural role of the coordinating anion in oxamato-bridged copper(II) derivatives†

Tatiana R. G. Simões,<sup>a</sup> Maria Vanda Marinho,<sup>b</sup> Jorge Pasán,<sup>c</sup> Humberto O. Stumpf,<sup>d</sup>  
Nicolás Moliner,<sup>e</sup> Francesc Lloret<sup>e</sup> and Miguel Julve,<sup>\*e</sup>

---

<sup>a</sup>*Departamento de Química, Universidade Federal do Paraná, Centro Politécnico, Curitiba-PR, 81530-900, Brazil*

<sup>b</sup>*Instituto de Química, Universidade Federal de Alfenas, Campus Santa Clara, Alfenas, Minas Gerais, 37130-001, Brazil*

<sup>c</sup>*Laboratorio de Rayos X y Materiales Moleculares (MATMOL), Departamento de Física, Facultad de Ciencias (Sección Física), Universidad de La Laguna, Edificio de Física y Matemáticas, Apdo. 456, E-38200 La Laguna, Tenerife, Spain.*

<sup>d</sup>*Departamento de Química, ICEX, Universidade Federal de Minas Gerais, Av. Antônio Carlos 6627, Belo Horizonte-MG, 31270-901, Brazil*

<sup>e</sup>*Departament de Química Inorgànica/Instituto de Ciencia Molecular, Facultat de Química de la Universitat de València, C/ Catedrático José Beltrán 2, 46980-Paterna (València), Spain. E-mail: [miguel.julve@uv.es](mailto:miguel.julve@uv.es)*

---

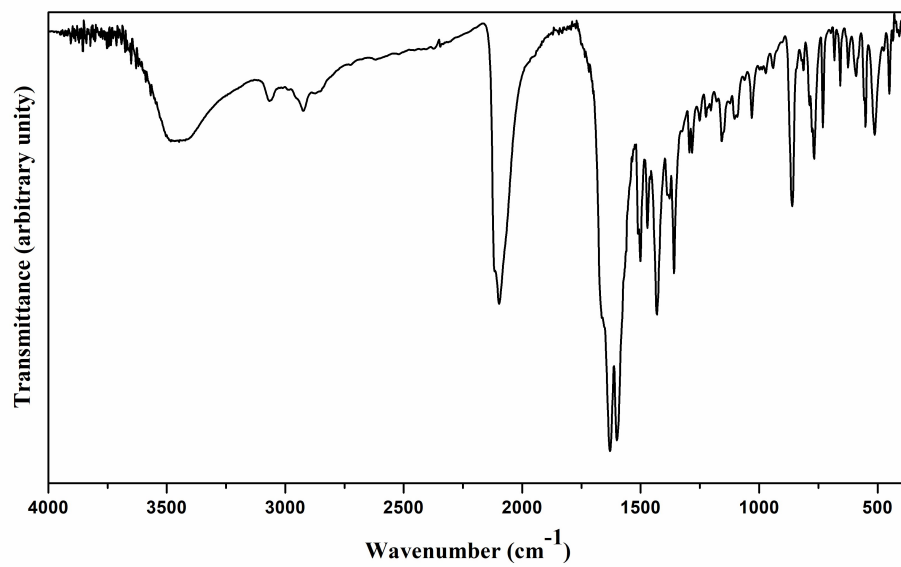

**Figure S1.** IR spectrum of **1**.

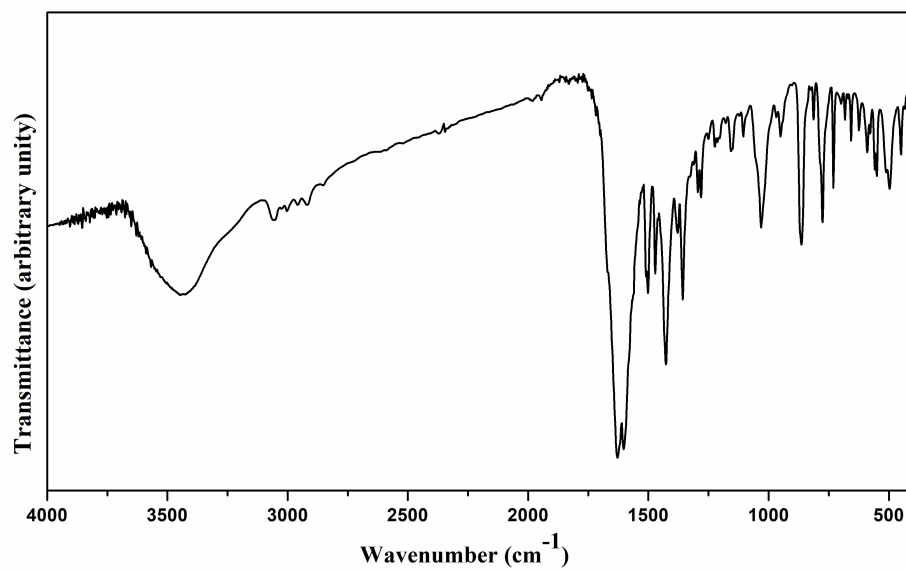

**Figure S2.** IR spectrum of **2**.

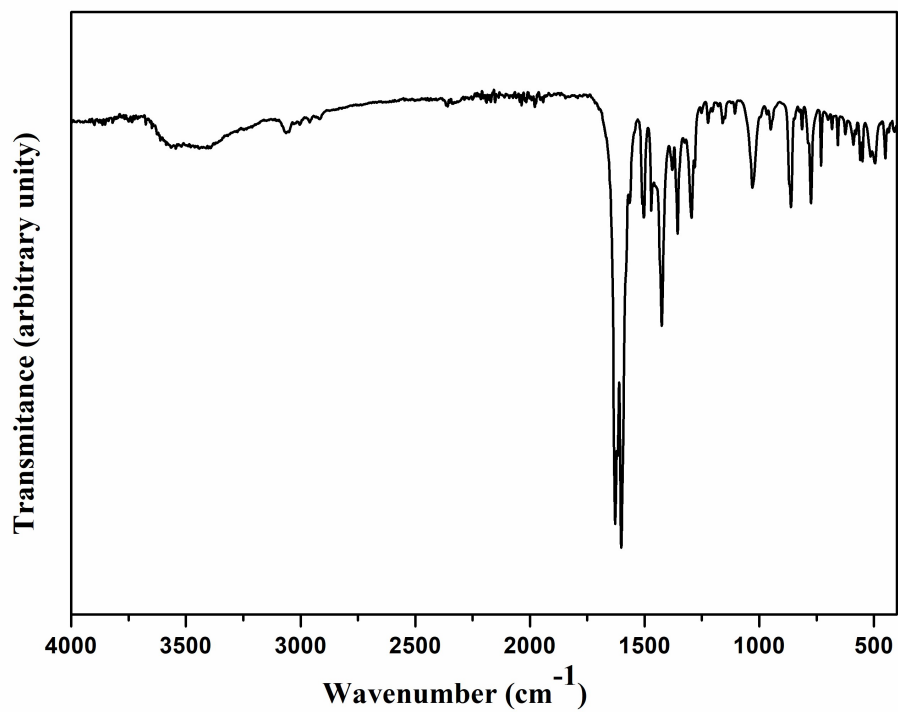

Figure S3. IR spectrum of 3.

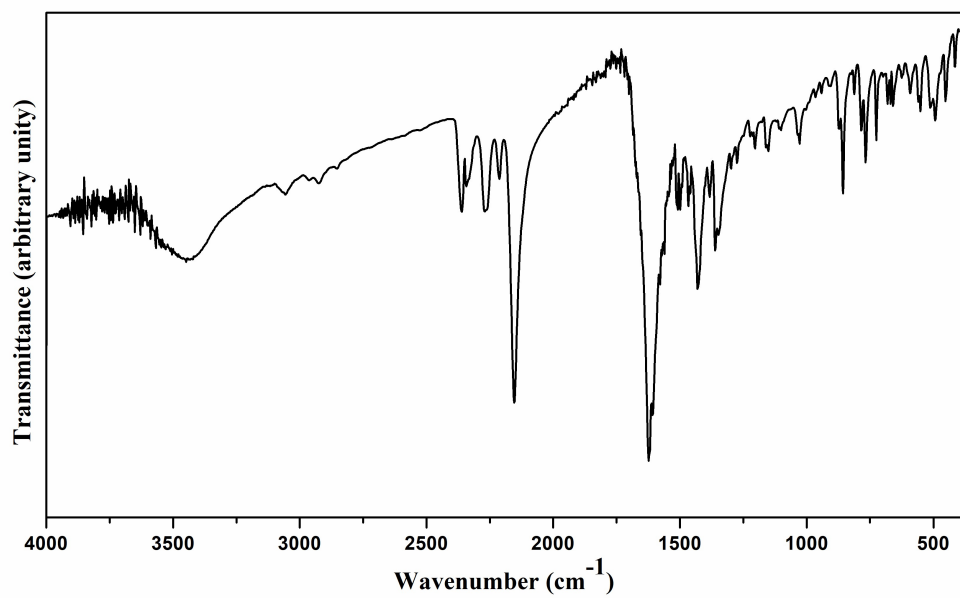

Figure S4. IR spectrum of 4.

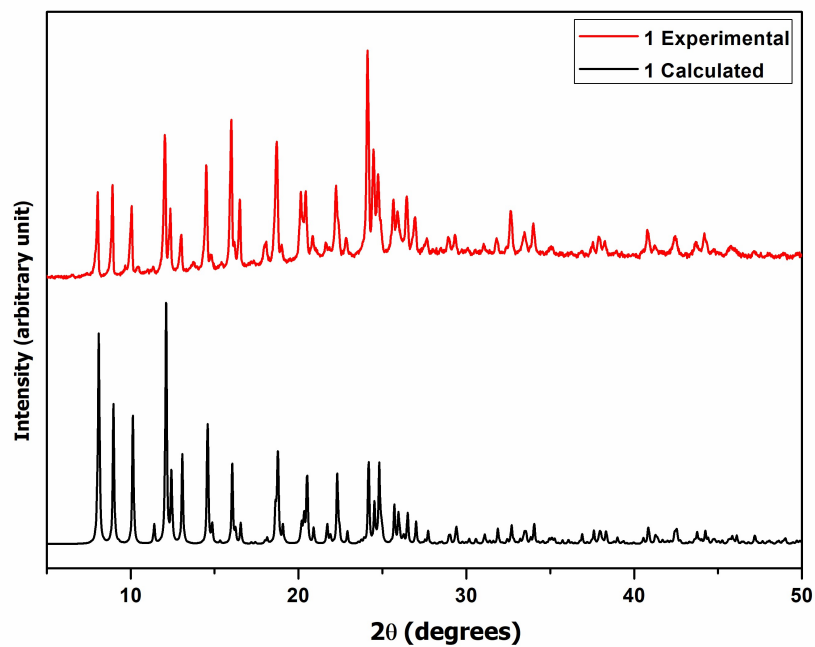

**Figure S5.** Experimental (red) and calculated (black) XRD patterns of **1**.

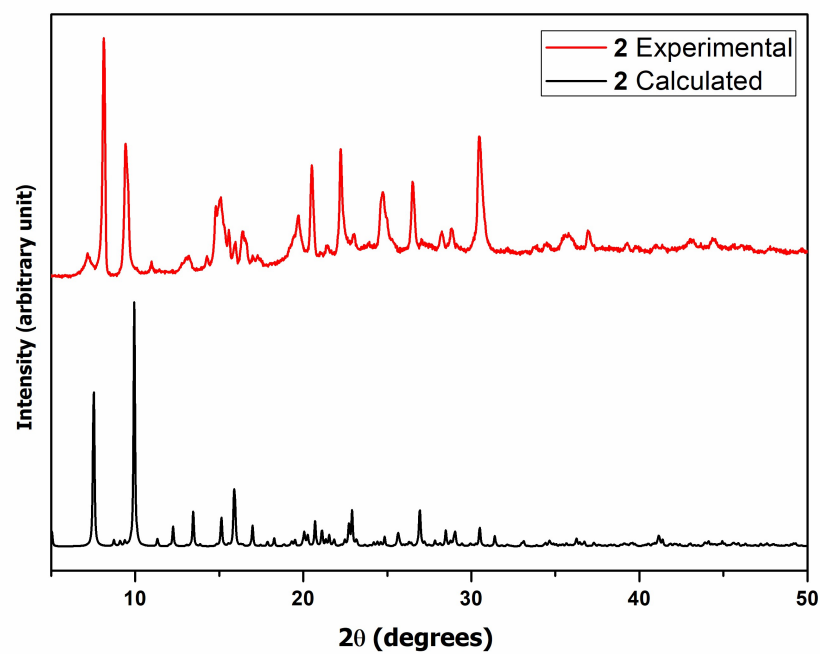

**Figure S6.** Experimental (red) and calculated (black) XRD patterns of **2**.

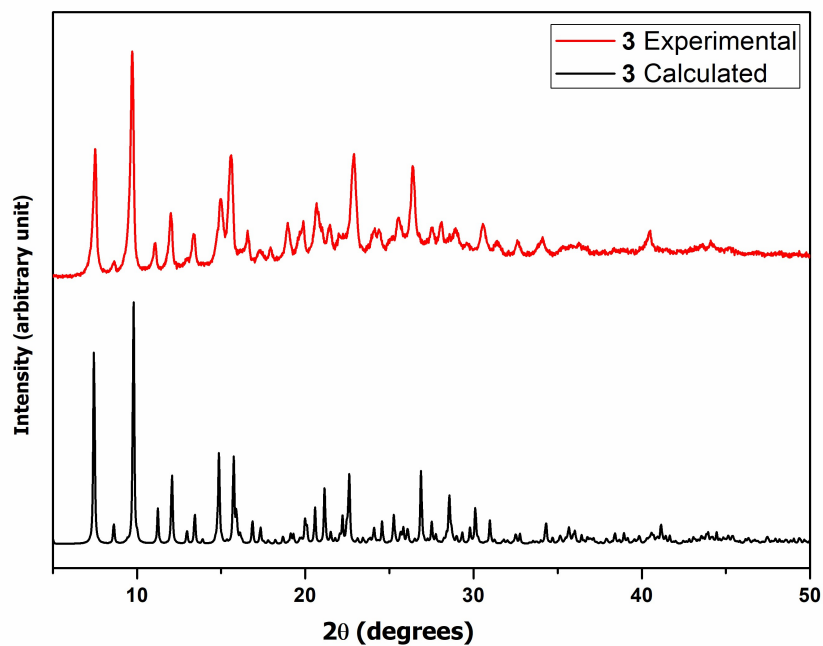

**Figure S7.** Experimental (red) and calculated (black) XRD patterns of **3**.

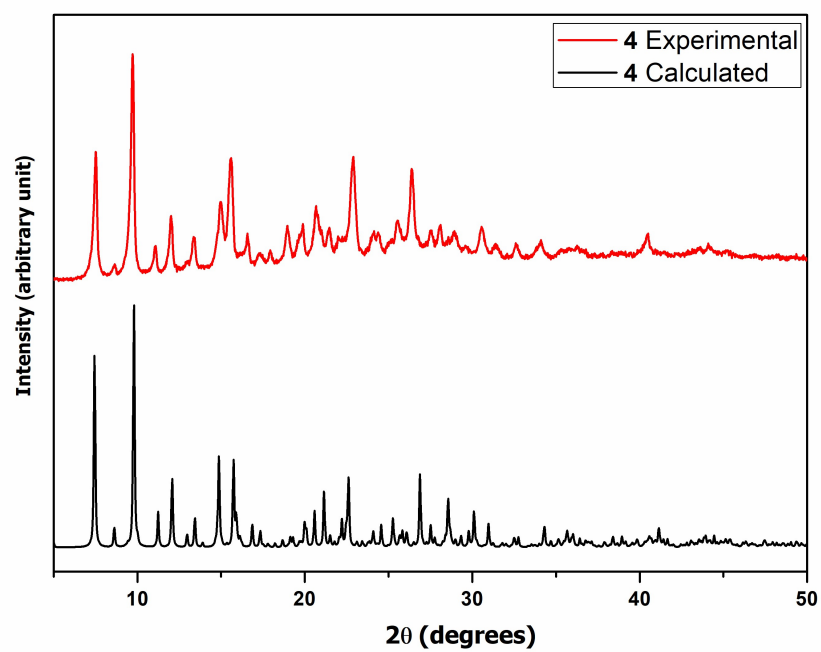

**Figure S8.** Experimental (red) and calculated (black) XRD patterns of **4**.

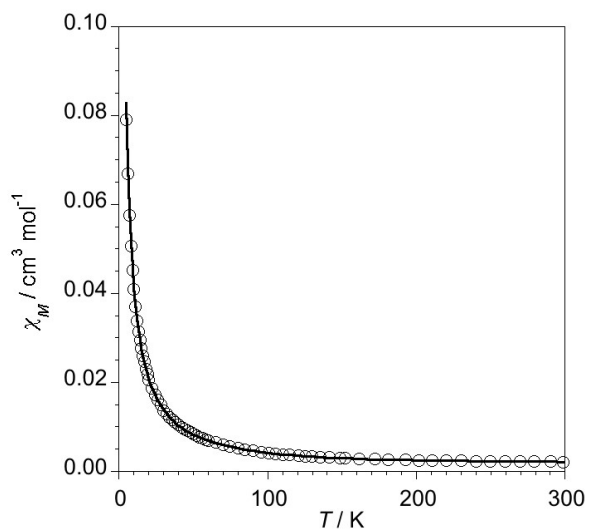

**Figure S9.**  $\chi_M$  against  $T$  plot for **1**: (o) experimental; (—) best-fit curve through eq (1) (see text).

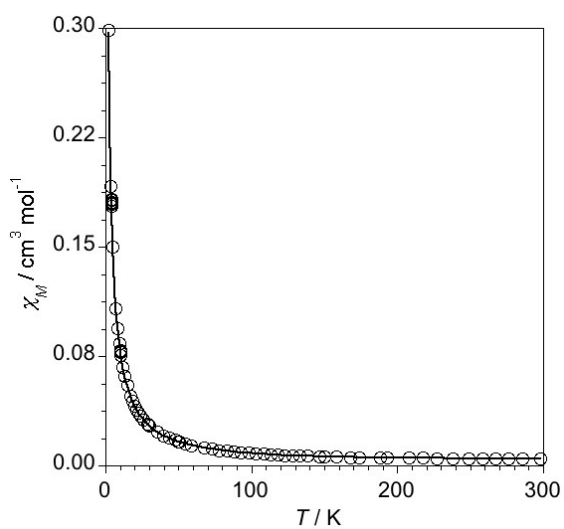

**Figure S10.**  $\chi_M$  against  $T$  plot for **2**: (o) experimental; (—) best-fit curve through eq (3) (see text).

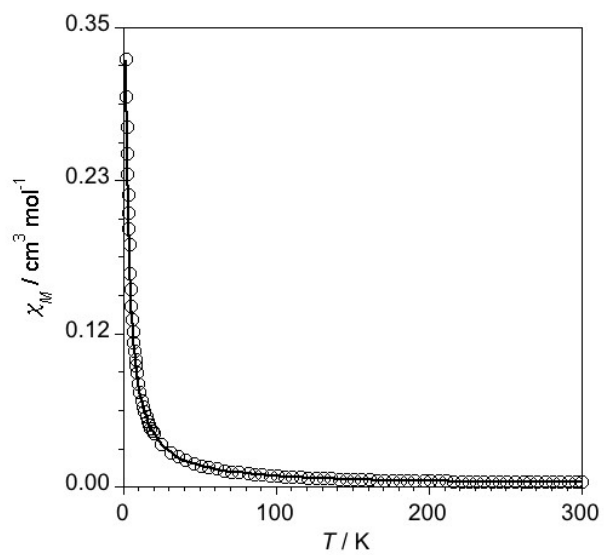

**Figure S11.**  $\chi_M$  against  $T$  plot for **3**: (o) experimental; (—) best-fit curve through eq (3) (see text).

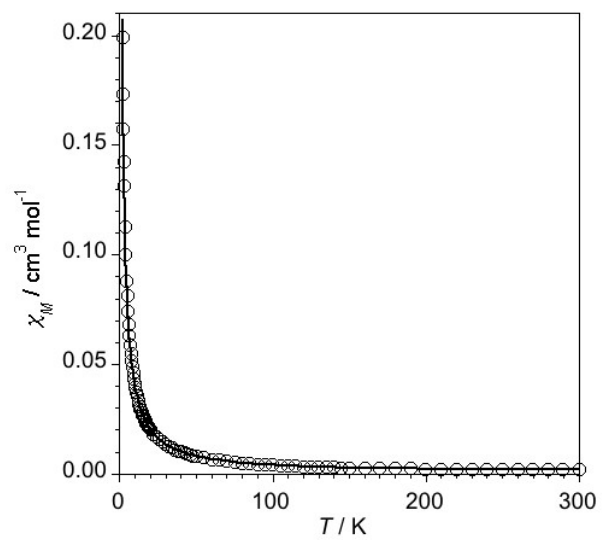

**Figure S12.**  $\chi_M$  against  $T$  plot for **4**: (o) experimental; (—) best-fit curve through eq (1) (see text).
